# Supplementary material for: Consecutive Extratropical Cyclones Daniel, Elsa and Fabien, and Their Impact on the Hydrological Cycle of Mainland Portugal
Source: MDPI journal article supplement (doi:10.3390/w13111476), 2021-05-24
Supplement: s1 [file s1]

Archive with 1 entries (1 files):
- water-1159302-supplementary.pdf
