# Supplementary material for: Consecutive Extratropical Cyclones Daniel, Elsa and Fabien, and Their Impact on the Hydrological Cycle of Mainland Portugal
Source: MDPI journal article supplement (doi:10.3390/w13111476), 2021-05-24
Supplement: s1 [file s1 › water-1159302-supplementary.pdf]

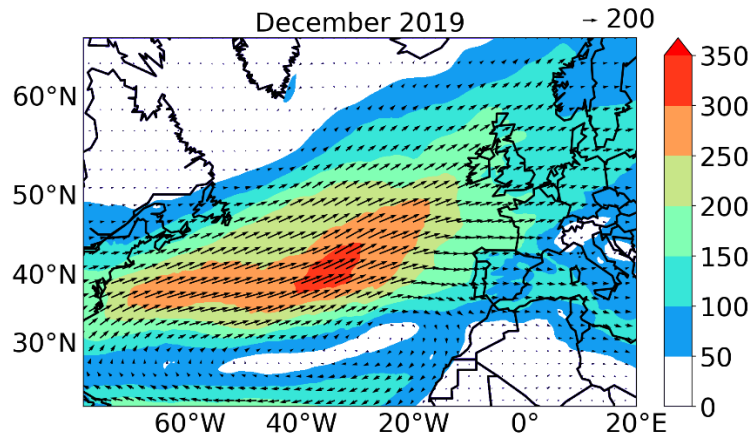

**Figure S1.** The average pattern of the IVT for December (period 1980-2019).

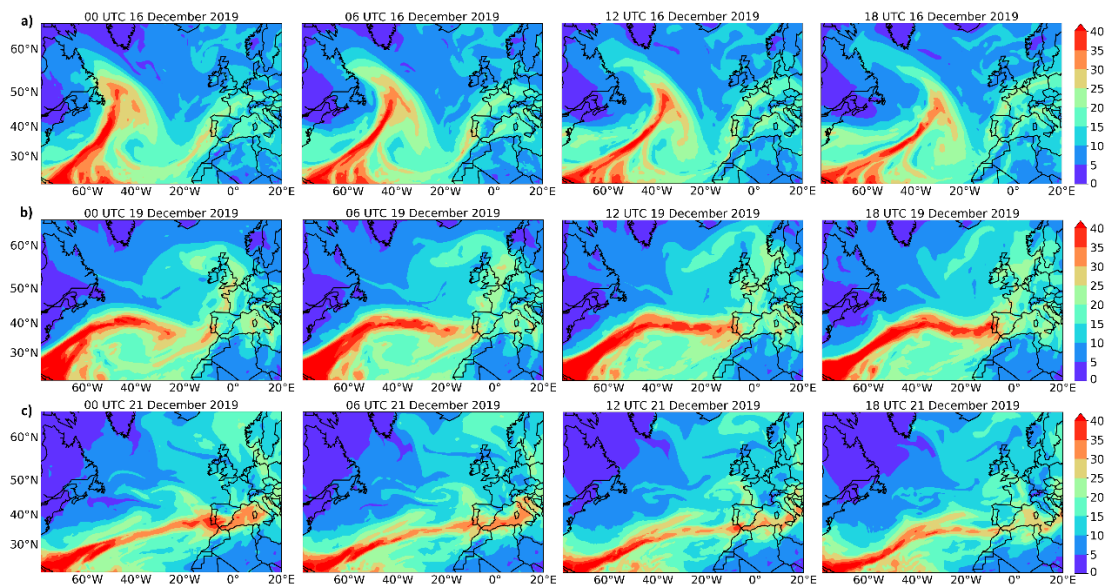

**Figure S2.** The pattern of total column water (units: kg/m<sup>2</sup>) for **a)** the Daniel storm for 16 December 2019, **b)** Elsa storm for 19 December 2019, and **c)** Fabien storm for 21 December 2019 (every six hours: 00, 06, 12 and 18 UTC).

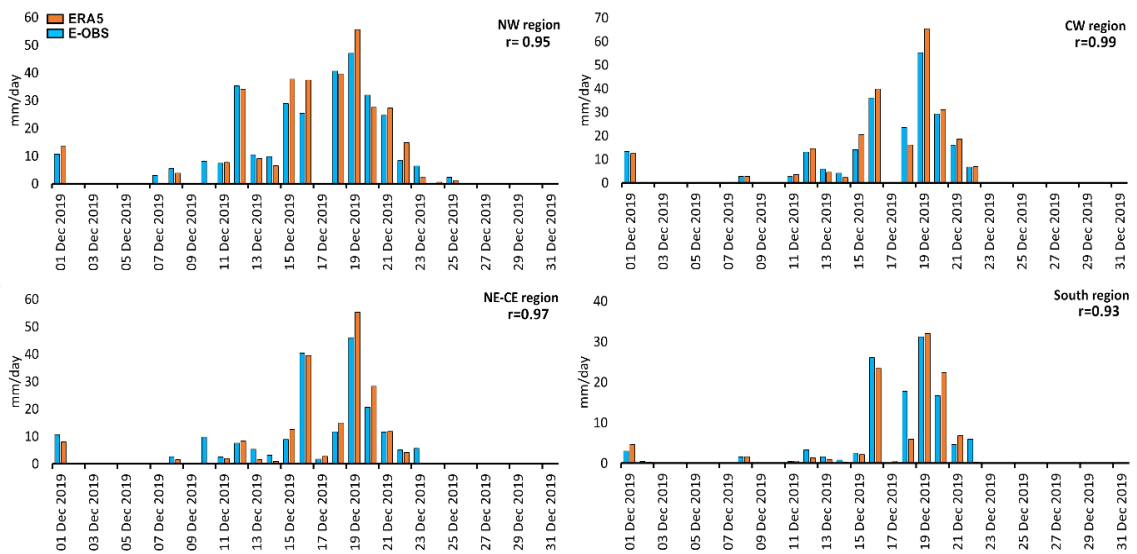

**Figure S3.** Daily precipitation from E-OBS (blue bars) and ERA5 (orange bars) for December 2019. R values represent the correlation between both series.
